# Supplementary material for: Bibliometric review on flexible pressure sensor design strategies
Source: Royal Society of Chemistry journal article supplement (doi:10.1039/d5nr00394f), 2025-01-01
Supplement: d5nr00394f1.pdf [file d5nr00394f1.pdf]

## Supporting Information

### Bibliometric review on flexible pressure sensor design strategies

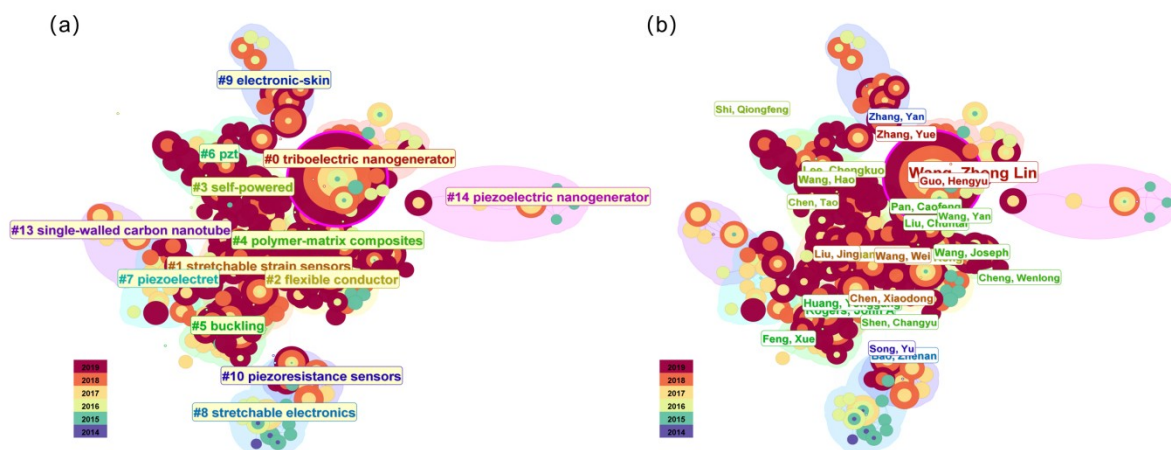

Figure S1. 2014-2019 Author clustering analysis: (a) clustered topics display, (b) author distribution.

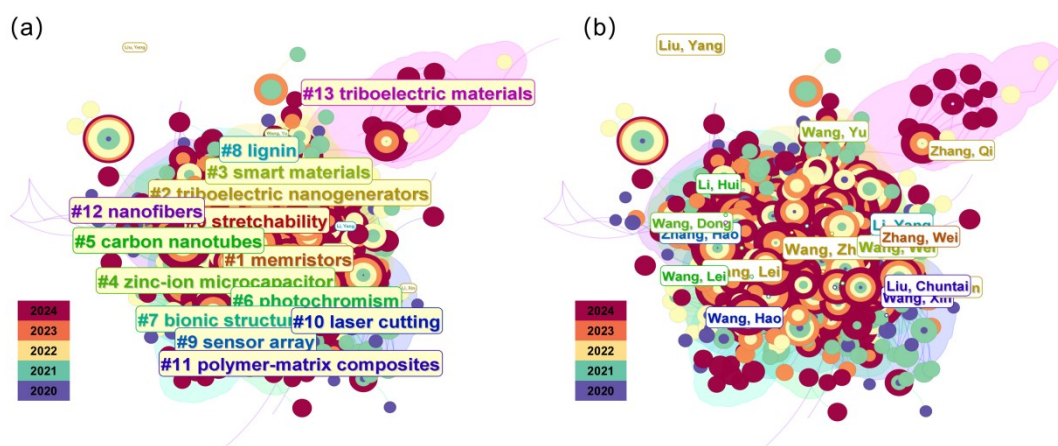

Figure S2. 2020-2024 Author clustering analysis: (a) clustered topics display, (b) author distribution.

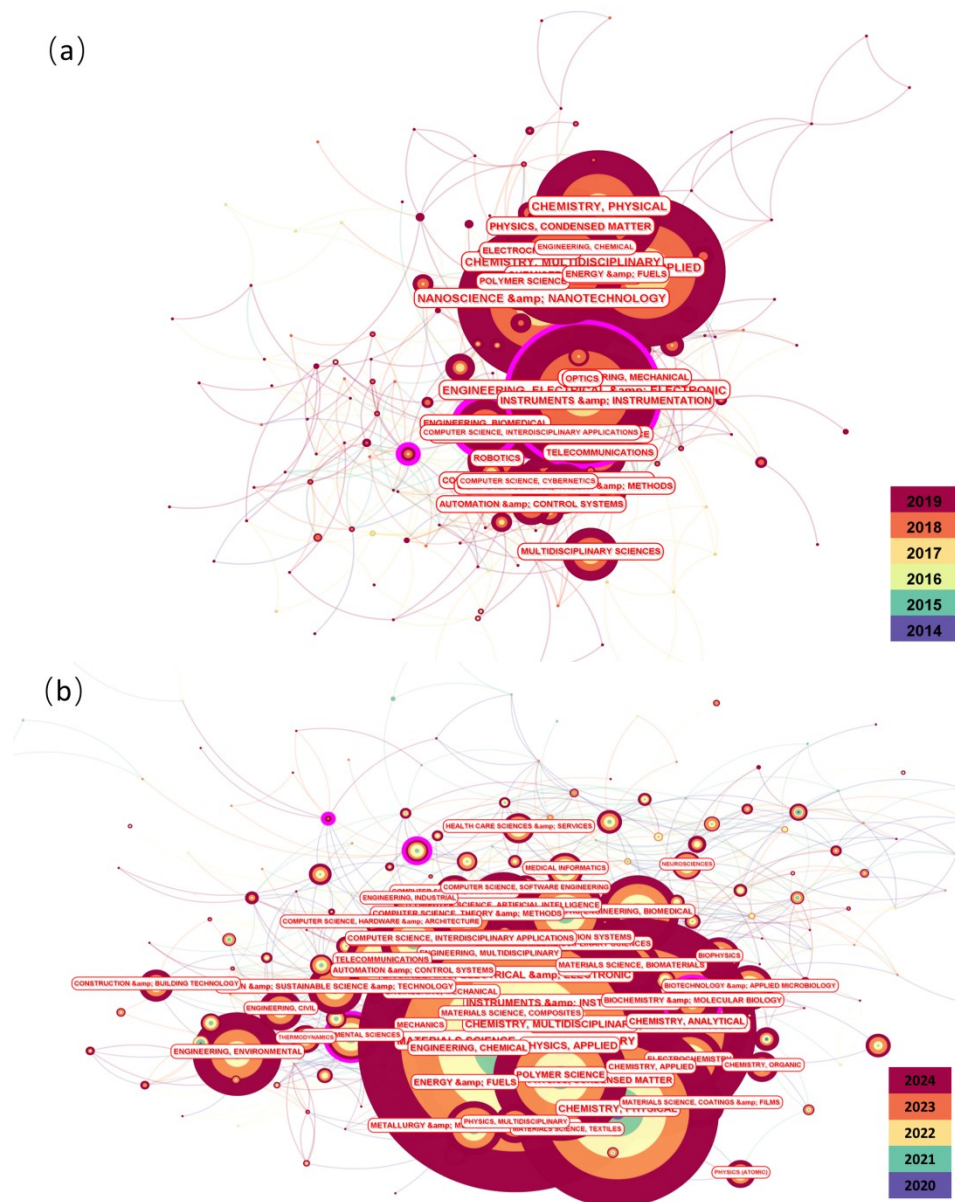

Figure S3. Cluster Analysis of Web of Science Subject Categories for Flexible Pressure Sensors: (a) 2014-2019 and (b) 2020-2024.
